## RESEARCH ARTICLE

# Association between COVID-19 pandemic declaration and depression/anxiety among U.S. adults

David Adzrago<sup>1\*</sup>, Saanie Sulley<sup>2</sup>, Ishmael Tagoe<sup>3</sup>, Emmanuel Odame<sup>4</sup>, Lohuwa Mamudu<sup>5</sup>, Faustine Williams<sup>6\*</sup>

**1** Center for Health Promotion and Prevention Research, The University of Texas School of Public Health, Houston, Texas, United States of America, **2** National Healthy Start Association, Washington, DC, United States of America, **3** School of Population Health, University of Toledo, Toledo, Ohio, United States of America, **4** Department of Environmental Health Sciences, School of Public Health, University of Alabama at Birmingham, Birmingham, Alabama, United States of America, **5** Department of Public Health, California State University, Fullerton, California, United States of America, **6** Division of Intramural Research, National Institute on Minority Health and Health Disparities, National Institutes of Health, Bethesda, Maryland, United States of America

\* [David.Adzrago@uth.tmc.edu](mailto:David.Adzrago@uth.tmc.edu) (DA); [Faustine.Williams@nih.gov](mailto:Faustine.Williams@nih.gov) (FW)

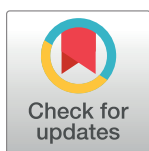

## OPEN ACCESS

**Citation:** Adzrago D, Sulley S, Tagoe I, Odame E, Mamudu L, Williams F (2022) Association between COVID-19 pandemic declaration and depression/anxiety among U.S. adults. PLoS ONE 17(12): e0279963. <https://doi.org/10.1371/journal.pone.0279963>

**Editor:** Daniel Demant, University of Technology Sydney, AUSTRALIA

**Received:** August 5, 2021

**Accepted:** December 15, 2022

**Published:** December 30, 2022

**Copyright:** This is an open access article, free of all copyright, and may be freely reproduced, distributed, transmitted, modified, built upon, or otherwise used by anyone for any lawful purpose. The work is made available under the [Creative Commons CC0](https://creativecommons.org/licenses/by/4.0/) public domain dedication.

**Data Availability Statement:** The data used for this study are publicly available at HINTS Data (<https://hints.cancer.gov/data/download-data.aspx>).

**Funding:** Dr. Williams' effort was supported by the Division of Intramural Research, National Institute on Minority Health and Health Disparities, National Institutes of Health (ZIA MD000015). The content is solely the responsibility of the authors and does not necessarily reflect the views of the National Institutes of Health.

## Abstract

### Background

Although studies have investigated the impact of the COVID-19 on mental health, few studies have attempted to compare the prevalence of depression/anxiety symptoms among U.S. adults before and after the COVID-19 pandemic declaration. We examined the prevalence and association between depression/anxiety symptoms and COVID-19 pandemic declaration among U.S. adult population and subgroups.

### Methods

A nationally representative cross-sectional study of the Health Information National Trends Survey (HINTS 5, Cycle 4) assessing health-related information and behaviors in U.S. adults aged  $\geq 18$  years from February through June 2020. The primary dependent variable was **current** depression/anxiety derived from Patient Health Questionnaire-4. The main independent variable was responses before and after the COVID-19 pandemic declaration in addition to sexual identity heterosexual identity, /race/ethnicity and rural-urban commuting areas. Covariates were sociodemographic factors, and health risk behaviors. Weighted percentages, multivariable logistic regression, and Chi-square tests were used to establish the prevalence and association between current depression/anxiety and the independent variables and covariates.

### Results

A total of 3,865 participants completed the survey and included 35.3% of the participants before the COVID-19 pandemic declaration. Most of the sample were aged 50–64 years [33.0%]; males [51.0%]; and non-Hispanic Whites [70.1%]. The post-pandemic declaration

**Competing interests:** The authors have declared that no competing interests exist.

included participants, aged 35–49 years [27.0%]; females [52.6%]; and non-Hispanic Whites [59.6%]). The prevalence of depression/anxiety was higher after the COVID-19 pandemic declaration (32.2%) than before the declaration (29.9%). Higher risks of depression/anxiety symptoms after the declaration were associated with being a sexual minority ([adjusted odds ratio] AOR, 2.91 [95% confidence interval (CI), 1.38–6.14]) and having fair/poor general health (AOR, 2.91 [95% CI, 1.76–4.83]). The probability of experiencing depression/anxiety symptoms after the declaration was highest among homosexuals/lesbians/gays (65.6%) compared to bisexuals (39.6%), and heterosexuals (30.1%).

## Conclusions

In this study, young adults, non-Hispanic Whites, and those with fair/poor general health had a higher burden of depression/anxiety symptoms after the pandemic declaration. The development of psychological support strategies to promote wellbeing during the pandemic may reduce psychological distress in the population, especially among at-risk populations.

## Background

On March 11, 2020, the World Health Organization (WHO) declared the novel coronavirus SARS-CoV-2—the virus responsible for the COVID-19 outbreak a global pandemic [1]. At a news briefing, Dr. Tedros Adhanom Ghebreyesus, WHO Director-General, noted that over the past 2 weeks, the number of cases outside China increased 13-fold, and the number of countries reporting new cases have increased threefold. He emphasized that the WHO is “deeply concerned both by the alarming levels of spread and severity, and by the alarming levels of inaction.” He called on countries to take “urgent aggressive action” to protect their citizens to reduce transmission [1]. On March 13, 2020, by Proclamation 9994, the United States (U.S.) President declared a national emergency concerning the COVID-19 pandemic [2]. As a result, local, state, and federal governments implemented social distancing and social isolation, including stay-at-home, as well as shelter in place measures/orders to reduce the spread of the virus/disease. Despite the public health importance of these measures, evidence has shown that long-term isolation could have a profound effect on all aspects of society; including but not limited to economic hardships, as well as physical, psychosocial/mental health, and chronic diseases [3–7].

Studies on previous pandemics including Ebola, Middle East respiratory syndrome, severe respiratory syndrome, the influenza A as well as early published work on COVID-19 revealed a significant increase in mental health and distress [7, 8]. The sudden change in daily activities, social interactions, and the fear of being infected by the COVID-19 virus are major stressors that can increase the risk of mental health problems including depression/anxiety [9]. For instance, studies conducted among the general population, students, healthcare professionals, and other frontliners in Asia, Europe, and the Middle East indicated over 50% rise in depression, eating, and sleep disorders [10–22]. Although studies have investigated the impact of the COVID-19 on mental health, research that draws a comparison of the prevalence and association of depression/anxiety before and after the pandemic and emergency declaration in the U. S. is scarce.

Subsequently, our aims were (1) to examine the prevalence of depression/anxiety symptoms among the U.S. adults population before and after the COVID-19 pandemic declaration; (2)

the association between depression/anxiety symptoms and COVID-19 pandemic declaration; and (3) whether the association between depression/anxiety and COVID-19 pandemic declaration varies between and within-population subgroups by sociodemographic characteristics and rural/urban residence type. The findings would provide an important understanding of the adverse effect of the COVID-19 pandemic declaration on mental health and help develop effective mental health support or outreach strategies to promote wellbeing during pandemics and reduce social risk and distress in the population.

## Methods

### Study population and data

We examined data from the 2020 Health Information National Trends Survey (HINTS 5, Cycle 4) de-identified publicly available file (<https://hints.cancer.gov/data/download-data.aspx>), a nationally representative annual cross-sectional survey of non-institutionalized adult population of the U.S., sponsored by the National Cancer Institute (NCI) since 2003 [23, 24]. The HINTS was designed to assess health-related information and health-related behaviors such as anxiety/depression symptoms and sociodemographic characteristics. The HINTS 5, Cycle 4 is the new publicly available data and included a sample of 3,865 adults, which were used for our study. The data was collected from February through June 2020. We wrote our paper using the Strengthening the Reporting of Observational Studies in Epidemiology (STROBE) reporting guideline [25].

### Measures

**Dependent variable.** The main dependent variable of interest was current depression/anxiety status and was derived from Patient Health Questionnaire-4 (PHQ-4) in the HINTS 5 survey. The PHQ-4 is a validated four-item on a four-point Likert-type scale, which assesses symptoms/signs of depression/anxiety [26, 27]. The total scores range from 0–12, where scores are rated as normal/negative (0–2), mild (3–5), moderate (6–8), and severe (9–12) [26, 27]. We dichotomized the current depression/anxiety status variable to indicate current depression/anxiety status as normal/no depression/anxiety and depression/anxiety (mild/moderate/severe).

**Independent variables.** The primary independent variable was responses before and after the WHO declaration of the COVID-19 pandemic. This variable was obtained from the HINTS 5, Cycle 4 methodology report (<https://hints.cancer.gov/data/methodology-reports.aspx>) [24]. From the report, this variable can be used to examine responses before and after COVID-19 became a concern in the U.S. [24]. It can also be used to assess the impact of COVID-19 [24]. Thus, this variable was determined based on the WHO declaration of COVID-19 as a pandemic on March 11, 2020. The HINTS 5, cycle 4 data was collected from February through June 2020. The HINTS 5, Cycle 4 survey responses that were received by Westat before the declaration, were categorized as responses before the COVID-19 pandemic declaration and responses after the WHO declaration of the COVID-19 pandemic declaration.

The secondary independent variables were self-report sexual identity (heterosexual/straight, homosexual/lesbian/gay, and bisexual), race/ethnicity (non-Hispanic White, non-Hispanic Black/African American, Hispanic, non-Hispanic Asian, and non-Hispanic other), and rural-urban commuting areas (metropolitan and micropolitan/small town/rural). In Models 2 and 3, we recoded sexual identity to two groups (i.e., heterosexual/straight and homosexual/lesbian/gay/bisexual) due to limited samples in this subgroup.

## Covariates

Based on previous studies [28–30], we analyzed the following covariates in our study. As part of the HINTS survey, participants provided self-reported information on age (18–25, 26–34, 35–49, 50–64, and  $\geq 65$ ), sex (male and female), level of education completed (<High School, high school graduate, some college, and college graduate or higher), total annual family income (<\$20,000, \$20,000–\$34,999, \$35,000–\$49,999, \$50,000–\$74,999, and  $\geq$ \$75,000), and employment status (employed or unemployed), health insurance (no or yes), ever been diagnosed with depression/anxiety disorder symptoms (no or yes), and cigarette smoking status (non-smoker, former smoker, and current smoker). For this analysis, the following variables were collapsed; marital status (single/never been married, married/living as married/living with a romantic partner, separated/divorced, and widowed), general health status (excellent/very good/good and fair/poor), number of days per week of moderate physical activity intensity (none and at least one day per week), binge drinking (never and at least one/more times), and body mass index (BMI) (underweight [ $<18.5$ ], (healthy/normal weight [ $18.5$ – $24.9$ ], overweight [ $25.0$ – $29.9$ ], obese [ $\geq 30.0$ ]).

## Ethical approval

No Institutional Review Board approval was required for this study because our analytic sample was derived from publicly available data through the NCI website at <https://hints.cancer.gov/data/download-data.aspx>.

## Statistical analyses

The data samples were weighted by sampling weight and replicate weight, according to recommendations described by the HINTS [24]. The weighted analyses offset non-response bias and produce nationally representative estimates [24]. Prevalence estimates of demographic and current depression/anxiety characteristics were examined to characterize the sample on responses before and after the COVID-19 pandemic declaration. In Model I, we used multi-variable logistic regression to examine the association of current depression/anxiety in U.S. adults with COVID-19 pandemic declaration, sexual identity, race/ethnicity, and rural-urban commuting area, adjusting for the covariates (age, sex, level of education completed, total annual family income, and employment status, health insurance, depression/anxiety disorder symptoms, cigarette smoking status, marital status, general health status, moderate physical activity intensity, binge drinking, BMI). We further examined whether the association between depression/anxiety and COVID-19 pandemic declaration varies between and within-population subgroups (i.e. sexual identity, rural/urban commuting area, race/ethnicity, sex, employment, and general health). To perform between and within-group differences, we first examined the interactions between COVID-19 pandemic declaration and sexual identity, rural/urban commuting area, race/ethnicity, sex, employment, and general health, respectively, using joint significant effects with Adjusted Wald test. Next, we performed margin analyses to examine differences in current depression/anxiety between and within COVID-19 pandemic declaration and sexual identity (Fig 1), and differences in current depression/anxiety between and within COVID-19 pandemic declaration and general health status (Fig 2).

Additionally, in Model II and Model III we examined the independent variables and the covariates (i.e., age, sex, race/ethnicity, sexual identity, marital status, income, employment status, rural-urban commuting area, general health status, and physical activity) associated with depression/anxiety before and after the declaration of COVID-19 pandemic using multivariable logistic regression, respectively. All logistic regression models were based on complete cases analysis (i.e., listwise deletion). Results are reported using weighted percentages, adjusted

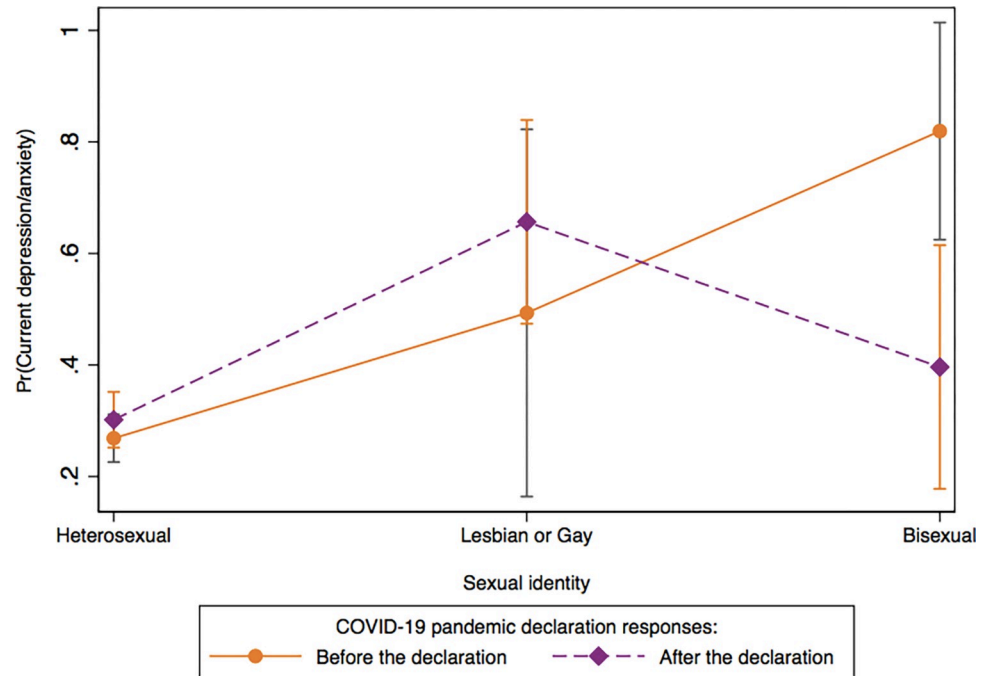

Fig 1. Differences in current depression/anxiety between and within sexual identity and COVID-19 pandemic declaration.

<https://doi.org/10.1371/journal.pone.0279963.g001>

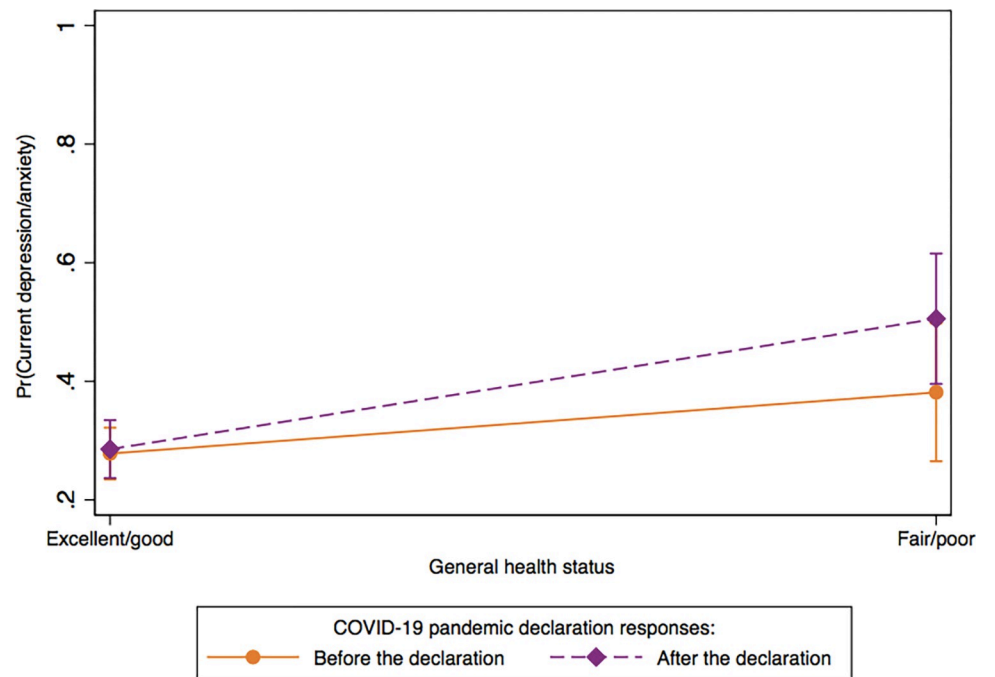

Fig 2. Differences in current depression/anxiety between and within general health status and COVID-19 pandemic declaration.

<https://doi.org/10.1371/journal.pone.0279963.g002>

odds ratios (AOR), 95% confidence intervals (CI) at 2-tailed, and statistically significant *p*-value at <0.05. We assessed multicollinearity among all the independent variables, there was no significant collinearity problems because our mean variance inflation factor was 1.19. Analyses were performed using STATA/SE, version 16.1 (StataCorp, 2019).

## Results

### Sample characteristics

[Table 1](#) describes the sociodemographic, health behaviors, and depression/anxiety characteristics of the study sample by responses before and after the WHO declared COVID-19 a pandemic. A total of 64.6% of the sample provided responses after the COVID-19 pandemic declaration. Among the responses after the COVID-19 pandemic declaration, were aged 35–49 (27.0%), female (52.6%), non-Hispanic White (59.6%), married/living as married (52.4%), had some college degree (38.9%), a total family annual income of  $\geq$ \$75,000 (40.8%), lived in the metropolitan commuting area (88.4%), and obese (35.4%). Slightly greater proportions of the sample after the COVID-19 pandemic declaration identified as lesbian/gay (2.9%) or bisexual (2.9%), had fair/poor general health (14.5%), unemployed (40.6%), no health insurance (9.4%), were not physically active (26.1%), current cigarette smoker (13.4%), engaged in binge drinking at least one time (43.7%), ever been diagnosed with depression/anxiety disorder (23.7%), and reported current mild/moderate/severe depression/anxiety symptoms (32.2%).

### Multivariable logistic regression

The multivariable logistic regression examining the association of current depression/anxiety with sociodemographic factors is shown in [Table 2](#). Individuals aged  $\geq$ 65 years (AOR, 0.33 [95% CI, 0.14–0.77]). were less likely to experience current depression/anxiety symptoms compared with those aged 18–25 years. Non-Hispanic Blacks (AOR, 0.59 [95% CI, 0.39–0.89]) and non-Hispanic Asians (AOR, 0.44 [95% CI, 0.21–0.89]) were less likely to experience depression/anxiety symptoms compared to non-Hispanic Whites. Homosexual/lesbian/gay (AOR, 4.45 [95% CI, 2.06–9.59]) and bisexual (AOR, 2.90 [95% CI, 1.09–7.72]) were more likely to experience depression/anxiety symptoms compared to heterosexual individuals. The population with a total annual family income of  $\geq$ \$75,000 (AOR, 0.59 [95% CI, 0.35–0.99]) was less likely to experience depression/anxiety symptoms compared to those with a total annual family income of <\$20,000. Unemployed individuals (AOR, 1.58 [95% CI, 1.01–2.47]) were more likely to experience depression/anxiety symptoms compared to employed individuals. Those who self-rated their general health as fair/poor (AOR, 2.39 [95% CI, 1.55–3.67]) were more likely to experience depression/anxiety symptoms compared to those who rated theirs as excellent/very good/good. Additionally, those who reported being physically active (AOR, 0.63 [95% CI, 0.44–0.90]) were less likely to experience depression/anxiety symptoms compared to those who did not engage in any moderate physical activity intensity. Contrary to our hypothesis, we did not find any significant overall differences in depression/anxiety symptoms between responses before and after the COVID-19 pandemic declaration.

[Table 3](#) shows depression/anxiety symptoms before and after the COVID-19 pandemic declaration, respectively. Compared with heterosexual individuals, homosexual/lesbian/gay/bisexual individuals had higher odds of depression/anxiety symptoms before the COVID-19 pandemic declaration (AOR, 5.76 [95% CI, 2.21–15.00]) and after the pandemic declaration (AOR, 2.91 [95% CI, 1.38–6.14]). Engaging in moderate physical activity intensity of at least one day per week was associated with lower odds of depression/anxiety symptoms compared with not engaging in moderate physical activity intensity before the declaration (AOR, 0.54 [95% CI, 0.34–0.87]) and after the declaration (AOR, 0.66 [95% CI, 0.44–0.99]). Compared

Table 1. Weighted descriptive statistics of U.S. adults stratified by response before and after the COVID-19 pandemic declaration, HINTS 5 Cycle 4.

| Characteristics                     | Overall sample      | Responses before the COVID-19 pandemic declaration | Responses after the COVID-19 pandemic declaration |
|-------------------------------------|---------------------|----------------------------------------------------|---------------------------------------------------|
|                                     | N (Weighted %, SE)  | n (Weighted %, SE)                                 | n (Weighted %, SE)                                |
|                                     | 3,865 (100%)        | 1,437 (35.3%, 0.01)                                | 2,428 (64.6%, 0.01)                               |
| <b>Age</b>                          |                     |                                                    |                                                   |
| 18–25                               | 147 (13.2, 0.01)    | 41 (10.2, 0.02)                                    | 106 (14.9, 0.01)                                  |
| 26–34                               | 337 (12.9, 0.01)    | 110 (9.6, 0.01)                                    | 227 (14.6, 0.01)                                  |
| 35–49                               | 703 (25.5, 0.01)    | 212 (22.7, 0.02)                                   | 491 (27.0, 0.02)                                  |
| 50–64                               | 1,142 (27.7, 0.01)  | 433 (33.0, 0.02)                                   | 709 (24.8, 0.01)                                  |
| ≥65                                 | 1,409 (20.5, <0.01) | 598 (24.3, 0.01)                                   | 811 (18.4, 0.01)                                  |
| <b>Sex</b>                          |                     |                                                    |                                                   |
| Female                              | 2,204 (51.3, <0.01) | 804 (49.00, 0.02)                                  | 1,400 (52.63, 0.01)                               |
| Male                                | 1,561 (48.6, <0.01) | 598 (51.00, 0.02)                                  | 963 (47.37, 0.01)                                 |
| <b>Race/ethnicity</b>               |                     |                                                    |                                                   |
| Non-Hispanic White                  | 2,133 (63.3, <0.01) | 904 (70.1, 0.02)                                   | 1,229 (59.6, 0.01)                                |
| Non-Hispanic Black                  | 481 (11.1, <0.01)   | 135 (8.3, 0.01)                                    | 346 (12.6, 0.01)                                  |
| Hispanic                            | 596 (16.9, <0.01)   | 170 (12.8, 0.02)                                   | 426 (19.2, 0.01)                                  |
| Non-Hispanic Asian                  | 161 (5.2, <0.01)    | 51 (4.1, 0.01)                                     | 110 (5.8, 0.01)                                   |
| Non-Hispanic other                  | 119 (3.3, <0.01)    | 49 (4.5, 0.01)                                     | 70 (2.6, 0.01)                                    |
| <b>Sexual identity</b>              |                     |                                                    |                                                   |
| Heterosexual                        | 3,402 (94.5, 0.01)  | 1,289 (95.3, 0.01)                                 | 2,113 (94.1, 0.01)                                |
| Homosexual/lesbian/gay              | 81 (2.6, 0.01)      | 26 (2.1, 0.01)                                     | 55 (2.9, 0.01)                                    |
| Bisexual                            | 82 (2.7, <0.01)     | 30 (2.4, 0.01)                                     | 52 (2.9, 0.01)                                    |
| <b>Marital status</b>               |                     |                                                    |                                                   |
| Single/never married                | 645 (30.7, <0.01)   | 212 (25.4, 0.02)                                   | 433 (33.7, 0.01)                                  |
| Married/living as married           | 1,978 (54.7, <0.01) | 750 (59.0, 0.02)                                   | 1,228 (52.4, 0.01)                                |
| Divorced/separated                  | 684 (9.7, <0.01)    | 265 (10.2, 0.01)                                   | 419 (9.5, 0.01)                                   |
| Widowed                             | 414 (4.6, <0.01)    | 166 (5.2, 0.01)                                    | 248 (4.2, <0.01)                                  |
| <b>Level of education completed</b> |                     |                                                    |                                                   |
| Less than High School               | 273 (8.0, 0.01)     | 90 (7.20, 0.01)                                    | 183 (8.4, 0.01)                                   |
| High School graduate                | 705 (22.5, 0.01)    | 251 (20.2, 0.02)                                   | 454 (23.7, 0.01)                                  |
| Some college                        | 1,081 (39.1, 0.01)  | 415 (39.6, 0.03)                                   | 666 (38.9, 0.01)                                  |
| College graduate/higher             | 1,663 (30.2, <0.01) | 643 (32.9, 0.02)                                   | 1,020 (28.8, 0.01)                                |
| <b>Total annual family income</b>   |                     |                                                    |                                                   |
| <\$20,000                           | 624 (15.1, 0.01)    | 216 (14.1, 0.01)                                   | 408 (15.6, 0.01)                                  |
| \$20,000 - \$34,999                 | 451 (11.4, 0.01)    | 170 (10.8, 0.02)                                   | 281 (11.8, 0.01)                                  |
| \$35,000 - \$49,999                 | 460 (12.6, 0.01)    | 166 (12.0, 0.02)                                   | 294 (13.0, 0.01)                                  |
| \$50,000 - \$74,999                 | 592 (18.2, 0.01)    | 229 (17.4, 0.02)                                   | 363 (1.7, 0.02)                                   |
| ≥\$75,000                           | 1,321 (42.4, 0.02)  | 514 (45.5, 0.03)                                   | 807 (4.8, 0.02)                                   |
| <b>General health status</b>        |                     |                                                    |                                                   |
| Excellent/very good/good            | 3,192 (85.8, 0.01)  | 1,200 (86.7, 0.02)                                 | 1,992 (85.4, 0.01)                                |
| Fair/poor                           | 627 (14.1, 0.01)    | 221 (13.3, 0.02)                                   | 406 (14.5, 0.01)                                  |
| <b>Employment status</b>            |                     |                                                    |                                                   |

(Continued)

Table 1. (Continued)

| Characteristics                                             | Overall sample      | Responses before the COVID-19 pandemic declaration | Responses after the COVID-19 pandemic declaration |
|-------------------------------------------------------------|---------------------|----------------------------------------------------|---------------------------------------------------|
|                                                             | N (Weighted %, SE)  | n (Weighted %, SE)                                 | n (Weighted %, SE)                                |
|                                                             | 3,865 (100%)        | 1,437 (35.3%, 0.01)                                | 2,428 (64.6%, 0.01)                               |
| Unemployed                                                  | 1,888 (40.8, 0.01)  | 756 (41.3, 0.02)                                   | 1,132 (40.6, 0.02)                                |
| Employed                                                    | 1,890 (59.1, 0.01)  | 652 (58.7, 0.02)                                   | 1,238 (59.3, 0.02)                                |
| <b>Health insurance</b>                                     |                     |                                                    |                                                   |
| No                                                          | 203 (9.0, <0.01)    | 63 (8.2, 0.01)                                     | 140 (9.4, 0.01)                                   |
| Yes                                                         | 3,604 (91.0, <0.01) | 1,352 (91.7, 0.01)                                 | 2,252 (90.5, 0.01)                                |
| <b>Rural-urban commuting area</b>                           |                     |                                                    |                                                   |
| Metropolitan                                                | 3,387 (87.1, 0.01)  | 1,217 (84.8, 0.01)                                 | 2,170 (88.4, 0.01)                                |
| Micropolitan/small town/rural                               | 478 (12.8, 0.01)    | 220 (15.1, 0.01)                                   | 258 (11.5, 0.01)                                  |
| <b>Body mass index (BMI)</b>                                |                     |                                                    |                                                   |
| Normal weight (18.5–24.9)                                   | 1,143 (32.8, 0.01)  | 438 (32.3, 0.03)                                   | 705 (33.1, 0.02)                                  |
| Underweight (<18.5)                                         | 63 (1.2, <0.01)     | 22 (1.3, <0.01)                                    | 41 (1.1, <0.01)                                   |
| Overweight (25.0–29.9)                                      | 1,265 (31.7, 0.01)  | 492 (34.4, 0.02)                                   | 773 (30.2, 0.02)                                  |
| Obese ( $\geq 30.0$ )                                       | 1,274 (34.1, 0.01)  | 454 (31.8, 0.03)                                   | 820 (35.4, 0.02)                                  |
| <b>Moderate physical activity intensity</b>                 |                     |                                                    |                                                   |
| None                                                        | 1,048 (32.8, 0.01)  | 392 (32.3, 0.02)                                   | 656 (33.1, 0.01)                                  |
| At least one day per week                                   | 2,750 (1.24, 0.01)  | 1,021 (1.3, 0.02)                                  | 1,729 (1.18, 0.01)                                |
| <b>Cigarette smoking status</b>                             |                     |                                                    |                                                   |
| Never                                                       | 2,422 (63.1, 0.01)  | 884 (60.5, 0.02)                                   | 1,538 (64.5, 0.02)                                |
| Former smoker                                               | 935 (23.0, 0.01)    | 372 (24.9, 0.02)                                   | 563 (22.0, 0.02)                                  |
| Current smoker                                              | 436 (13.8, 0.01)    | 158 (14.5, 0.02)                                   | 278 (13.4, 0.01)                                  |
| <b>Binge drinking</b>                                       |                     |                                                    |                                                   |
| Never                                                       | 3,192 (79.6, 0.01)  | 1,190 (78.6, 0.02)                                 | 2,002 (80.2, 0.01)                                |
| One/more times                                              | 673 (20.3, 0.01)    | 247 (21.3, 0.02)                                   | 426 (19.7, 0.01)                                  |
| <b>Ever been diagnosed with depression/anxiety disorder</b> |                     |                                                    |                                                   |
| No                                                          | 2,897 (75.6, 0.01)  | 1,086 (74.58, 0.02)                                | 1,811 (76.2, 0.01)                                |
| Yes                                                         | 908 (24.3, 0.01)    | 338 (25.42, 0.02)                                  | 570 (23.7, 0.01)                                  |
| <b>Current depression/anxiety status</b>                    |                     |                                                    |                                                   |
| None                                                        | 2,670 (68.5, 0.01)  | 1,003 (70.0, 0.02)                                 | 1,667 (67.7, 0.02)                                |
| Mild/moderate/severe                                        | 1,060 (31.4, 0.01)  | 387 (29.9, 0.02)                                   | 673 (32.2, 0.02)                                  |

Data Source: 2020 Health Information National Trends Survey (HINTS 5, Cycle 4).

Unweighted N = 3,865, and Weighted N = 253815197

SE = Standard error.

<https://doi.org/10.1371/journal.pone.0279963.t001>

with individuals with total family annual income of <\$20,000, individuals who reported family annual income of \$20,000–\$34,999 (AOR, 0.41 [95% CI, 0.18–0.97]) and  $\geq$ \$75,000 (AOR, 0.45 [95% CI, 0.21–0.96]) had lower odds of reporting depression/anxiety symptoms. Similarly, compared to those aged 18–25 years, the older population ( $\geq 65$  years) had decreased risk of having depression/anxiety symptoms after the pandemic declaration (AOR, 0.30 [95% CI, 0.12–0.74]). Non-Hispanic Black (AOR, 0.58 [95% CI, 0.36–0.95]) and non-Hispanic Asian individuals (AOR, 0.40 [95% CI, 0.18–0.91]) had lower odds of depression/anxiety symptoms compared with non-Hispanic White individuals after the declaration. As expected, individuals



**Table 2. Association of current depression/anxiety with sociodemographic, health characteristics and COVID-19 pandemic declaration among U.S. adults aged  $\geq 18$  years, HINTS 5 Cycle 4 -Model I.**

|                                             | AOR            | 95% CI             |
|---------------------------------------------|----------------|--------------------|
| <b>Age</b>                                  |                |                    |
| 18–25                                       | Ref            | -                  |
| 26–34                                       | 1.26           | (0.64–2.49)        |
| 35–49                                       | 1.02           | (0.53–1.99)        |
| 50–64                                       | 0.70           | (0.35–1.41)        |
| $\geq 65$                                   | <b>0.33**</b>  | <b>(0.14–0.77)</b> |
| <b>Sex</b>                                  |                |                    |
| Female                                      | Ref            | -                  |
| Male                                        | 0.78           | (0.56–1.08)        |
| <b>Race/ethnicity</b>                       |                |                    |
| Non-Hispanic White                          | Ref            | -                  |
| Non-Hispanic Black                          | <b>0.59**</b>  | (0.39–0.89)        |
| Hispanic                                    | 0.93           | (0.62–1.39)        |
| Non-Hispanic Asian                          | <b>0.44*</b>   | (0.21–0.89)        |
| Non-Hispanic other                          | 1.83           | (0.81–4.10)        |
| <b>Sexual identity</b>                      |                |                    |
| Heterosexual                                | Ref            | -                  |
| Homosexual/lesbian/gay                      | <b>4.45***</b> | (2.06–9.59)        |
| Bisexual                                    | <b>2.90*</b>   | (1.09–7.72)        |
| <b>Marital status</b>                       |                |                    |
| Single/never married                        | Ref            | -                  |
| Married/living as married                   | 0.86           | (0.55–1.36)        |
| Divorced/separated                          | 1.24           | (0.70–2.20)        |
| Widowed                                     | 1.43           | (0.71–2.91)        |
| <b>Total family annual income</b>           |                |                    |
| <\$20,000                                   | Ref            | -                  |
| \$20,000 - \$34,999                         | 0.59           | (0.34–1.05)        |
| \$35,000 - \$49,999                         | 0.60           | (0.31–1.15)        |
| \$50,000 - \$74,999                         | 0.68           | (0.38–1.20)        |
| $\geq$ \$75,000                             | <b>0.59*</b>   | <b>(0.35–0.99)</b> |
| <b>Employment status</b>                    |                |                    |
| Employed                                    | Ref            | -                  |
| Unemployed                                  | <b>1.58*</b>   | <b>(1.01–2.47)</b> |
| <b>Rural-urban commuting area</b>           |                |                    |
| Metropolitan                                | Ref            | -                  |
| Micropolitan/Small town/rural               | 0.87           | (0.60–1.27)        |
| <b>General health status</b>                |                |                    |
| Excellent/very good/good                    | Ref            | -                  |
| Fair/poor                                   | <b>2.39***</b> | <b>(1.55–3.67)</b> |
| <b>Moderate physical activity intensity</b> |                |                    |
| None                                        | Ref            | -                  |
| At least one day per week                   | <b>0.63**</b>  | <b>(0.44–0.90)</b> |
| <b>COVID-19 declaration</b>                 |                |                    |
| Responses before the declaration            | Ref            | -                  |

*(Continued)*

**Table 2.** (Continued)

|                                 | AOR  | 95% CI      |
|---------------------------------|------|-------------|
| Responses after the declaration | 1.13 | (0.80–1.60) |

Data Source: 2020 Health Information National Trends Survey, (HINTS 5, Cycle 4).

Unweighted N = 3,865, and Weighted N = 253815197

AOR = Adjusted odds ratio.

95% CI = 95% confidence interval.

Ref = Reference group.

\* $p \leq 0.05$

\*\* $p \leq 0.01$

\*\*\* $p \leq 0.001$ .

<https://doi.org/10.1371/journal.pone.0279963.t002>

with fair/poor general health had increased odds (AOR, 2.91 [95% CI, 1.76–4.83]) of having depression/anxiety symptoms after the pandemic declaration when compared to those who reported excellent/very good/good general health.

### Between and within current depression/anxiety comparison

**Fig 1** describes the differences in current depression/anxiety between and within sexual identity and the pandemic declaration. Results revealed that between the sexual identity subgroups, individuals who self-identified as bisexuals (81.9%) had the highest probability of experiencing depression/anxiety symptoms before the pandemic declaration compared to lesbians/gays (49.3%) and heterosexuals (26.8%). Examining responses after the pandemic declaration showed a 16.3% and 3.3% increase in current depression/anxiety symptoms among lesbians/gays (49.3 vs. 65.6) and heterosexuals (26.8 vs. 30.1%) respectively. Whereas the probability of depression/anxiety symptoms among bisexuals (39.6%) was higher compared to heterosexuals, it was lower than before the pandemic declaration.

**Fig 2** depicts that the probability of experiencing depression/anxiety symptoms was higher after the declaration than before. Before the pandemic declaration, individuals who rated their general health as fair/poor had a significantly higher probability of experiencing depression/anxiety symptoms compared to those who rated their health as excellent/good (38.1% vs. 27.8%). After the pandemic declaration, the probability of experiencing depression/anxiety symptoms significantly increased among those who rated their general health as fair/poor compared to those who rated theirs as excellent/good (50.5% vs. 28.5%). We found significant interaction only between COVID-19 pandemic declaration and sexual identity ( $p = 0.002$ ) and general health ( $p = 0.001$ ).

### Discussion

To our knowledge, this is the first study to examine the association between depression/anxiety and stay-at-home orders following the WHO and the national emergency declaration by the U.S. President on March 11<sup>th</sup> and 13<sup>th</sup> 2020, while accounting for sociodemographic characteristics and place of residence. We found that being a sexual minority (i.e., homosexual/lesbian/gay/bisexual) was strongly associated with depression/anxiety symptoms. For instance, lesbians/gays/bisexuals were 191% more likely to report depression/anxiety symptoms, relative to heterosexuals. Total family income, employment status, general health, and physical activity elevated depression/anxiety symptom levels among the U.S. adult population after the WHO and the national emergency pandemic declaration in March 2020.

**Table 3. Odd ratios and confidence intervals for associations between current depression/anxiety with sociodemographic and health characteristics stratified by before and after the declaration of COVID-19 pandemic among U.S. adults aged ≥18 years, HINTS 5 Cycle 4.**

|                                             | Before the COVID-19 pandemic declaration (Model II) |                     | After the COVID-19 pandemic declaration (Model III) |                    |
|---------------------------------------------|-----------------------------------------------------|---------------------|-----------------------------------------------------|--------------------|
|                                             | AOR                                                 | 95% CI              | AOR                                                 | 95% CI             |
| <b>Age</b>                                  |                                                     |                     |                                                     |                    |
| 18–25                                       | Ref                                                 | -                   |                                                     | Ref                |
| 26–34                                       | 1.86                                                | (0.60–5.74)         | 1.10                                                | (0.56–2.18)        |
| 35–49                                       | 1.33                                                | (0.41–4.35)         | 0.96                                                | (0.48–1.92)        |
| 50–64                                       | 1.05                                                | (0.33–3.38)         | 0.59                                                | (0.28–1.24)        |
| ≥65                                         | 0.43                                                | (0.16–1.20)         | <b>0.30***</b>                                      | <b>(0.12–0.74)</b> |
| <b>Sex</b>                                  |                                                     |                     |                                                     |                    |
| Female                                      | Ref                                                 | -                   |                                                     | Ref                |
| Male                                        | 0.82                                                | (0.52–1.28)         | 0.80                                                | (0.54–1.19)        |
| <b>Race/ethnicity</b>                       |                                                     |                     |                                                     |                    |
| Non-Hispanic White                          | Ref                                                 | -                   |                                                     | Ref                |
| Non-Hispanic Black                          | 0.59                                                | (0.24–1.45)         | <b>0.58*</b>                                        | <b>(0.36–0.95)</b> |
| Hispanic                                    | 1.48                                                | (0.74–2.97)         | 0.77                                                | (0.46–1.27)        |
| Non-Hispanic Asian                          | 0.47                                                | (0.15–1.47)         | <b>0.40*</b>                                        | <b>(0.18–0.91)</b> |
| Non-Hispanic other                          | 3.61                                                | (0.95–13.76)        | 1.08                                                | (0.47–2.50)        |
| <b>Sexual identity</b>                      |                                                     |                     |                                                     |                    |
| Heterosexual                                | Ref                                                 | -                   |                                                     | Ref                |
| Homosexual/lesbian/gay                      | <b>5.76***</b>                                      | <b>(2.21–15.00)</b> | <b>2.91***</b>                                      | <b>(1.38–6.14)</b> |
| Bisexual                                    |                                                     |                     |                                                     |                    |
| <b>Marital status</b>                       | Ref                                                 | -                   |                                                     | Ref                |
| Single/never married                        | 0.77                                                | (0.34–1.78)         | 0.92                                                | (0.58–1.47)        |
| Married/living as married                   | 1.53                                                | (0.66–3.55)         | 1.09                                                | (0.58–2.05)        |
| Divorced/separated                          | 1.50                                                | (0.50–4.51)         | 1.37                                                | (0.64–2.91)        |
| Widowed                                     |                                                     |                     |                                                     |                    |
| <b>Total family annual income</b>           | Ref                                                 |                     |                                                     | Ref                |
| <\$20,000                                   | <b>0.41*</b>                                        | <b>(0.18–0.97)</b>  | 0.67                                                | (0.33–1.34)        |
| \$20,000 - \$34,999                         | 0.61                                                | (0.28–1.36)         | 0.55                                                | (0.26–1.17)        |
| \$35,000 - \$49,999                         | 0.61                                                | (0.28–1.33)         | 0.68                                                | (0.35–1.33)        |
| \$50,000 - \$74,999                         | <b>0.45*</b>                                        | <b>(0.21–0.96)</b>  | 0.61                                                | (0.31–1.22)        |
| ≥\$75,000                                   |                                                     |                     |                                                     |                    |
| <b>Employment status</b>                    | Ref                                                 |                     |                                                     | Ref                |
| Employed                                    | 1.61                                                | (0.96–2.71)         | 1.54                                                | (0.94–2.54)        |
| Unemployed                                  |                                                     |                     |                                                     |                    |
| <b>Rural-urban commuting area</b>           | Ref                                                 |                     |                                                     | Ref                |
| Metropolitan                                | 0.78                                                | (0.41–1.49)         | 0.95                                                | (0.60–1.51)        |
| Micropolitan/Small town/rural               |                                                     |                     |                                                     |                    |
| <b>General health status</b>                | Ref                                                 |                     |                                                     | Ref                |
| Excellent/very good/good                    | 1.46                                                | (0.86–2.48)         | <b>2.91***</b>                                      | <b>(1.76–4.83)</b> |
| Fair/poor                                   |                                                     |                     |                                                     |                    |
| <b>Moderate physical activity intensity</b> | Ref                                                 |                     |                                                     | Ref                |
| None                                        | <b>0.54**</b>                                       | <b>(0.34–0.87)</b>  | <b>0.66*</b>                                        | <b>(0.44–0.99)</b> |

(Continued)

Table 3. (Continued)

|                           | Before the COVID-19 pandemic declaration (Model II) |        | After the COVID-19 pandemic declaration (Model III) |        |
|---------------------------|-----------------------------------------------------|--------|-----------------------------------------------------|--------|
|                           | AOR                                                 | 95% CI | AOR                                                 | 95% CI |
| At least one day per week | Ref                                                 | -      |                                                     | Ref    |

Data Source: 2020 Health Information National Trends Survey (HINTS 5, Cycle 4).

Unweighted N = 3,865, and Weighted N = 253815197

**Model II** (if before the declaration of COVID-19 pandemic) = independent variables + covariates.

**Model III** (if after the declaration of COVID-19 pandemic) = independent variables + covariates.

AOR = Adjusted odds ratio. 95% CI = 95% confidence interval.

Ref = Reference group.

\* $p \leq 0.05$

\*\* $p \leq 0.01$

\*\*\* $p \leq 0.001$

<https://doi.org/10.1371/journal.pone.0279963.t003>

According to the National Center for Health Statistics, the prevalence of depression/anxiety was higher during the pandemic than before (i.e., 6.5% and 8.1%, respectively) [31]. Ettman et al. [12] used the AmeriSpeak panel and the National Health and Nutrition Examination Survey (NHANES) to assess the prevalence and factors associated with depression symptoms among U.S. adults during and before the COVID-19 pandemic. The authors reported that the severity of depression symptoms was significantly higher during the pandemic than before. A systematic review [32] on the effect of the pandemic on psychiatric disorders and suicide rates revealed a significant association between the COVID-19 pandemic and high levels of distress, anxiety, fear of contagion, depression, and abnormal sleep in the general population and among healthcare workers. Consistent with these findings, we found that approximately a third (i.e., 31.4%) of the study population reported current mild/moderate/severe depression/anxiety symptoms during the pandemic. Additionally, we found a 2.2% increase in the proportion of U.S. adults who reported experiencing depression/anxiety after the pandemic declaration (i.e., 32.2% vs. 29.9%). Even though the multivariate logistic regression did not reveal any significant association between COVID-19 pandemic declaration and depression/anxiety symptoms in the overall U.S. adult population, significant differences exist in some sub-populations. For instance, young adults, non-Hispanic Whites, those with poor/fair health were more likely to report depression/anxiety symptoms while the elderly, people who engaged in moderate physical activity, non-Hispanic Blacks, and Asians were less likely to report depression/anxiety symptoms. Moreover, self-reported depression/anxiety symptoms remained significantly higher among sexual minorities than in heterosexuals, although the odds were higher before the pandemic declaration.

Sociodemographic factors including age, race/ethnicity, and sexual identity have been reported to affect depression/anxiety during the pandemic [11–13, 16, 21, 33–40]. Czeisler et al. [34] [N = 5,573] analyzed cross-sectional nationally representative data on adults aged  $\geq 18$  years in Australia and U.S. regarding public support for stay-at-home orders and coping strategies. Results indicated a higher prevalence of depression/anxiety among younger individuals and women staying at home or in quarantine relative to those not in quarantine. Lofrano-Prado et al. [35] investigated the impact of stay-at-home orders and social distancing on mental health and found that women experienced increased anxiety, depression, low self-esteem, sadness, and stress compared to men. Similar results were reported in other countries, including Australia [16], India [39], Italy [15], Philippines [37], Spain [13, 17], and Turkey [21]. Our study revealed that U.S. adults aged  $\geq 65$  years were 70% less likely to report current

depression/anxiety when compared to younger adults aged 18–25 years. We observed no statistically significant association between COVID-19 declaration and sex, nor was there an association found with marital status. The present study further showed that both non-Hispanic Black and non-Hispanic Asian had decreased odds of experiencing current depression/anxiety symptoms (42% vs. 60%, respectively). Earlier studies suggested depression/anxiety among homosexuals/lesbian/gay and bisexual individuals was higher than among heterosexual individuals [41, 42]. Consistent with published studies, those self-identified as homosexual/lesbian/gay and bisexual had the highest probability for depression/anxiety symptoms despite a slight increase in heterosexual responses after the declaration.

The burden of the COVID-19 pandemic has resulted in the loss of work, income, and disruption of social life, and associated high psychological distress worldwide. Regarding socioeconomic factors, our study found that individuals with a total family annual income of  $\geq$ \$75,000 had a 41% decreased odds of experiencing current depression/anxiety while unemployed individuals had a 58% increased odds of current depression. These findings are consistent with other studies that showed an increase in anxiety/depression because of restrictions placed on activities during the pandemic [38, 43].

COVID-19 pandemic social distancing and stay-at-home orders did not only overwhelm the delivery of healthcare around the world but some individuals with underlying conditions were compelled to delay/avoid seeking healthcare due to the lockdown. Unsurprisingly, our analysis indicated that individuals with fair/poor health had 191% higher odds of current depression/anxiety relative to before the declaration. As noted in previous research, regular physical activity improves immune system function, and it is likely to provide protective buffers and reduce stress, as well as prevents the onset of chronic diseases and mental health conditions [44, 45]. Correspondingly, those who reported engaging in moderate physical activity at least once per week were 34% less likely to experience current depression/anxiety after the pandemic declaration. These findings are important for understanding the adverse effect of the COVID-19 pandemic declaration on the mental health of U.S. adults, especially among homosexuals/lesbians/gay/bisexuals and those in poor health.

### Limitations

This study has some limitations. First, the HINTS is a cross-sectional survey, and therefore, we were unable to establish any causal relationship between the WHO COVID-19 pandemic declaration and anxiety/depression. Second, HINTS did not include questions that specifically assess COVID-19 outcomes among the participants. Furthermore, the data is self-reported and may result in recall and social desirability biases. Also, the HINTS 5, cycle 4 data was collected from February through June 2020, hence, we were able to account for changes in the prevalence of depression/anxiety after June 2020, which may explain the temporal sequence of depression/anxiety across time.

### Conclusions

In this population-based, nationally representative sample of U.S. adults, we found that the COVID-19 declaration had a varied impact on the population. Overall, young adults, non-Hispanic Blacks, non-Hispanic Asian, and individuals with fair/poor self-reported health status, had higher odds of depression/anxiety symptoms after the pandemic declaration. Further, the high risk of depression/anxiety among sexual minority groups highlights the need to develop sustainable, community-focused, and community-led efforts to alleviate some of our society's mental health problems. Moreover, the development of psychological support strategies to

promote wellbeing during and after the pandemic may reduce psychological distress in the population, especially among at-risk populations.

## Author Contributions

**Conceptualization:** David Adzrago, Saanie Sulley, Ishmael Tagoe, Emmanuel Odame, Faustine Williams.

**Data curation:** David Adzrago, Saanie Sulley, Ishmael Tagoe, Emmanuel Odame, Lohuwa Mamudu, Faustine Williams.

**Formal analysis:** David Adzrago.

**Methodology:** David Adzrago, Saanie Sulley, Ishmael Tagoe, Emmanuel Odame, Lohuwa Mamudu.

**Supervision:** Faustine Williams.

**Validation:** David Adzrago, Lohuwa Mamudu, Faustine Williams.

**Visualization:** David Adzrago, Faustine Williams.

**Writing – original draft:** David Adzrago, Saanie Sulley, Ishmael Tagoe, Emmanuel Odame, Lohuwa Mamudu, Faustine Williams.

**Writing – review & editing:** David Adzrago, Saanie Sulley, Ishmael Tagoe, Emmanuel Odame, Lohuwa Mamudu, Faustine Williams.

## References

1. WHO Director-General's opening remarks at the media briefing on COVID-19—11 March 2020 [Internet]. 2020 [cited June 27, 2021]. Available from: <https://www.who.int/director-general/speeches/detail/who-director-general-s-opening-remarks-at-the-media-briefing-on-covid-19—11-march-2020>
2. Notice on the Continuation of the National Emergency Concerning the Coronavirus Disease 2019 (COVID-19) Pandemic [Internet]. 2020 [cited June 26, 2021]. Available from: <https://www.whitehouse.gov/briefing-room/presidential-actions/2021/02/24/notice-on-the-continuation-of-the-national-emergency-concerning-the-coronavirus-disease-2019-covid-19-pandemic/>
3. Badr H, Du H, Marshall M, Dong E, Squire M, Gardner LM. Social distancing is effective at mitigating COVID-19 transmission in the United States. medRxiv. 2020.
4. Holt-Lunstad J, Smith TB, Layton JB. Social relationships and mortality risk: a meta-analytic review. *PLoS Med.* 2010; 7(7):e1000316–e. <https://doi.org/10.1371/journal.pmed.1000316> PMID: 20668659.
5. Koenig HG. Maintaining Health and Well-Being by Putting Faith into Action During the COVID-19 Pandemic. *J Relig Health.* 2020. Epub 2020/05/16. <https://doi.org/10.1007/s10943-020-01035-2> PMID: 32409989; PubMed Central PMCID: PMC7224109.
6. Lai J, Ma S, Wang Y, Cai Z, Hu J, Wei N, et al. Factors associated with mental health outcomes among health care workers exposed to coronavirus disease 2019. *JAMA network open.* 2020; 3(3):e203976–e. <https://doi.org/10.1001/jamanetworkopen.2020.3976> PMID: 32202646
7. Brooks SK, Webster RK, Smith LE, Woodland L, Wessely S, Greenberg N, et al. The psychological impact of quarantine and how to reduce it: rapid review of the evidence. *The lancet.* 2020; 395(10227):912–20. [https://doi.org/10.1016/S0140-6736\(20\)30460-8](https://doi.org/10.1016/S0140-6736(20)30460-8) PMID: 32112714
8. Sergeant A, van Reekum EA, Sanger N, Dufort A, Rosic T, Sanger S, et al. Impact of COVID-19 and other pandemics and epidemics on people with pre-existing mental disorders: a systematic review protocol and suggestions for clinical care. *BMJ open.* 2020; 10(9):e040229. <https://doi.org/10.1136/bmjopen-2020-040229> PMID: 32873685
9. Momenimovahed Z, Salehiniya H, Hadavandsiri F, Allahqoli L, Günther V, Alkatout I. Psychological Distress Among Cancer Patients During COVID-19 Pandemic in the World: A Systematic Review. *Frontiers in psychology.* 2021; 12:682154–. <https://doi.org/10.3389/fpsyg.2021.682154> PMID: 34650469.
10. Ali M, Uddin Z, Ahsan NF, Haque MZ, Bairagee M, Khan SA, et al. Prevalence of mental health symptoms and its effect on insomnia among healthcare workers who attended hospitals during COVID-19

- pandemic: A survey in Dhaka city. *Heliyon*. 2021; 7(5):e06985. <https://doi.org/10.1016/j.heliyon.2021.e06985> PMID: 34027184
11. Chi X, Becker B, Yu Q, Willeit P, Jiao C, Huang L, et al. Prevalence and Psychosocial Correlates of Mental Health Outcomes Among Chinese College Students During the Coronavirus Disease (COVID-19) Pandemic. *Frontiers in Psychiatry*. 2020; 11(803). <https://doi.org/10.3389/fpsy.2020.00803> PMID: 32848958
  12. Ettman CK, Abdalla SM, Cohen GH, Sampson L, Vivier PM, Galea S. Prevalence of depression symptoms in US adults before and during the COVID-19 pandemic. *JAMA network open*. 2020; 3(9): e2019686–e. <https://doi.org/10.1001/jamanetworkopen.2020.19686> PMID: 32876685
  13. González-Sanguino C, Ausín B, Castellanos MÁ, Saiz J, López-Gómez A, Ugidos C, et al. Mental health consequences during the initial stage of the 2020 Coronavirus pandemic (COVID-19) in Spain. *Brain, behavior, and immunity*. 2020; 87:172–6. <https://doi.org/10.1016/j.bbi.2020.05.040> PMID: 32405150
  14. Hyun S, Hahm HC, Wong GTF, Zhang E, Liu CH. Psychological correlates of poor sleep quality among US young adults during the COVID-19 pandemic. *Sleep medicine*. 2021; 78:51–6.
  15. Mazza C, Ricci E, Biondi S, Colasanti M, Ferracuti S, Napoli C, et al. A nationwide survey of psychological distress among Italian people during the COVID-19 pandemic: immediate psychological responses and associated factors. *International journal of environmental research and public health*. 2020; 17(9):3165. <https://doi.org/10.3390/ijerph17093165> PMID: 32370116
  16. Rahman MA, Hoque N, Alif SM, Salehin M, Islam SMS, Banik B, et al. Factors associated with psychological distress, fear and coping strategies during the COVID-19 pandemic in Australia. *Globalization and Health*. 2020; 16(1):1–15.
  17. Rodríguez-Rey R, Garrido-Hernansaiz H, Collado S. Psychological impact and associated factors during the initial stage of the coronavirus (COVID-19) pandemic among the general population in Spain. *Frontiers in psychology*. 2020; 11:1540. <https://doi.org/10.3389/fpsyg.2020.01540> PMID: 32655463
  18. Rossi R, Socci V, Pacitti F, Di Lorenzo G, Di Marco A, Siracusano A, et al. Mental health outcomes among frontline and second-line health care workers during the coronavirus disease 2019 (COVID-19) pandemic in Italy. *JAMA network open*. 2020; 3(5):e2010185–e. <https://doi.org/10.1001/jamanetworkopen.2020.10185> PMID: 32463467
  19. Yang G, Li C, Zhu X, Yan J, Liu J. Prevalence of and risk factors associated with sleep disturbances among HPCD exposed to COVID-19 in China. *Sleep medicine*. 2021; 80:16–22. <https://doi.org/10.1016/j.sleep.2020.12.034> PMID: 33540240
  20. Yıldırım M, Akgül Ö, Geçer E. The effect of COVID-19 anxiety on general health: The role of COVID-19 coping. *International Journal of Mental Health and Addiction*. 2021:1–12. <https://doi.org/10.1007/s11469-020-00429-3> PMID: 33456406
  21. Yıldırım M, Özslan A. Worry, severity, controllability, and preventive behaviours of COVID-19 and their associations with mental health of Turkish healthcare workers working at a pandemic hospital. *International Journal of Mental Health and Addiction*. 2021:1–15.
  22. Pak H, Süsen Y, Nazlıgül MD, Griffiths M. The Mediating Effects of Fear of COVID-19 and Depression on the Association Between Intolerance of Uncertainty and Emotional Eating During the COVID-19 Pandemic in Turkey. *International journal of mental health and addiction*. 2021:1–15. <https://doi.org/10.1007/s11469-021-00489-z> PMID: 33564278
  23. Finney Rutten LJ, Blake KD, Skolnick VG, Davis T, Moser RP, Hesse BW. Data resource profile: the national cancer institute's health information national trends survey (HINTS). *International journal of epidemiology*. 2020; 49(1):17–j. <https://doi.org/10.1093/ije/dyz083> PMID: 31038687
  24. Westat. Health Information National Trends Survey 5 (HINTS 5) Cycle 4: Methodology Report. Bethesda, MD: National Cancer Institute, December 2020.
  25. von Elm E, Altman DG, Egger M, Pocock SJ, Gøtzsche PC, Vandenbroucke JP. The Strengthening the Reporting of Observational Studies in Epidemiology (STROBE) Statement: Guidelines for reporting observational studies. *International Journal of Surgery*. 2014; 12(12):1495–9. <https://doi.org/10.1016/j.ijsu.2014.07.013> PMID: 25046131
  26. Kroenke K, Spitzer RL, Williams JB, Löwe B. An ultra-brief screening scale for anxiety and depression: the PHQ-4. *Psychosomatics*. 2009; 50(6):613–21. <https://doi.org/10.1176/appi.psy.50.6.613> PMID: 19996233
  27. Löwe B, Wahl I, Rose M, Spitzer C, Glaesmer H, Wingenfeld K, et al. A 4-item measure of depression and anxiety: validation and standardization of the Patient Health Questionnaire-4 (PHQ-4) in the general population. *Journal of affective disorders*. 2010; 122(1–2):86–95. <https://doi.org/10.1016/j.jad.2009.06.019> PMID: 19616305

28. Akre E-R, Anderson A, Stojanovski K, Chung KW, VanKim NA, Chae DH. Depression, anxiety, and alcohol use among LGBTQ+ people during the COVID-19 pandemic. *American journal of public health*. 2021; 111(9):1610–9. <https://doi.org/10.2105/AJPH.2021.306394> PMID: 34410817
29. Aranda F, Matthews AK, Hughes TL, Muramatsu N, Wilsnack SC, Johnson TP, et al. Coming out in color: Racial/ethnic differences in the relationship between level of sexual identity disclosure and depression among lesbians. *Cultural Diversity and Ethnic Minority Psychology*. 2015; 21(2):247. <https://doi.org/10.1037/a0037644> PMID: 25181323
30. Yu B, Zhang X, Wang C, Sun M, Jin L, Liu X. Trends in depression among Adults in the United States, NHANES 2005–2016. *Journal of Affective Disorders*. 2020; 263:609–20. <https://doi.org/10.1016/j.jad.2019.11.036> PMID: 31744739
31. Early release of selected mental health estimates based on data from the January–June 2019 National Health Interview Survey [Internet]. US Department of Health and Human Services, CDC, National Center for Health . . . ; 2020 [cited July 2, 2021]. Available from: <https://www.cdc.gov/nchs/data/nhis/earlyrelease/ERmentalhealth-508.pdf>
32. Sher L. The impact of the COVID-19 pandemic on suicide rates. *QJM: An International Journal of Medicine*. 2020; 113(10):707–12. <https://doi.org/10.1093/qjmed/hcaa202> PMID: 32539153
33. Ali M, Ahsan G, Khan R, Khan H, Hossain A. Immediate impact of stay-at-home orders to control COVID-19 transmission on mental well-being in Bangladeshi adults: Patterns, Explanations, and future directions. *BMC Research Notes*. 2020; 13(1):494–. <https://doi.org/10.1186/s13104-020-05345-2> PMID: 33092649
34. Czeisler MÉ, Howard ME, Robbins R, Barger LK, Facer-Childs ER, Rajaratnam SM, et al. Early public adherence with and support for stay-at-home COVID-19 mitigation strategies despite adverse life impact: a transnational cross-sectional survey study in the United States and Australia. *BMC public health*. 2021; 21(1):1–16.
35. Lofrano-Prado MC, do Prado WL, Botero JP, Cardel ML, Farah BQ, Oliveira MD, et al. The same storm but not the same boat: Effects of COVID-19 stay-at-home order on mental health in individuals with overweight. *Clinical obesity*. 2021; 11(1):e12425. <https://doi.org/10.1111/cob.12425> PMID: 33217224
36. McCleskey J, Gruda D. Risk-taking, resilience, and state anxiety during the COVID-19 pandemic: A coming of (old) age story. *Personality and Individual Differences*. 2021; 170:110485.
37. Tee ML, Tee CA, Anlacan JP, Aligam KJG, Reyes PWC, Kuruchittham V, et al. Psychological impact of COVID-19 pandemic in the Philippines. *Journal of affective disorders*. 2020; 277:379–91. <https://doi.org/10.1016/j.jad.2020.08.043> PMID: 32861839
38. Tull MT, Edmonds KA, Scamaldo KM, Richmond JR, Rose JP, Gratz KL. Psychological outcomes associated with stay-at-home orders and the perceived impact of COVID-19 on daily life. *Psychiatry research*. 2020; 289:113098. <https://doi.org/10.1016/j.psychres.2020.113098> PMID: 32434092
39. Varshney M, Parel JT, Raizada N, Sarin SK. Initial psychological impact of COVID-19 and its correlates in Indian Community: An online (FEEL-COVID) survey. *PloS one*. 2020; 15(5):e0233874. <https://doi.org/10.1371/journal.pone.0233874> PMID: 32470088
40. Verger P, Dab W, Lamping DL, Loze J-Y, Deschaseaux-Voinet C, Abenheim L, et al. The psychological impact of terrorism: an epidemiologic study of posttraumatic stress disorder and associated factors in victims of the 1995–1996 bombings in France. *American Journal of Psychiatry*. 2004; 161(8):1384–9. <https://doi.org/10.1176/appi.ajp.161.8.1384> PMID: 15285963
41. Flentje A, Obedin-Maliver J, Lubensky ME, Dastur Z, Neilands T, Lunn MR. Depression and anxiety changes among sexual and gender minority people coinciding with onset of COVID-19 pandemic. *Journal of general internal medicine*. 2020; 35(9):2788–90. <https://doi.org/10.1007/s11606-020-05970-4> PMID: 32556877
42. Salerno JP, Devadas J, Pease M, Nketia B, Fish JN. Sexual and gender minority stress amid the COVID-19 pandemic: implications for LGBTQ young persons' mental health and well-being. *Public Health Reports*. 2020; 135(6):721–7. <https://doi.org/10.1177/0033354920954511> PMID: 33026972
43. Zhu K, Niu Z, Freudenheim JL, Zhang Z-F, Lei L, Homish GG, et al. COVID-19 Related Symptoms of Anxiety, Depression, and PTSD among US Adults. *Psychiatry research*. 2021; 301:113959. <https://doi.org/10.1016/j.psychres.2021.113959> PMID: 33964602
44. Jacquart J, Dutcher CD, Freeman SZ, Stein AT, Dinh M, Carl E, et al. The effects of exercise on transdiagnostic treatment targets: A meta-analytic review. *Behaviour Research and Therapy*. 2019; 115:19–37. <https://doi.org/10.1016/j.brat.2018.11.007> PMID: 30473437
45. Nieman DC, Wentz LM. The compelling link between physical activity and the body's defense system. *Journal of Sport and Health Science*. 2019; 8(3):201–17. <https://doi.org/10.1016/j.jshs.2018.09.009> PMID: 31193280
